# Supplementary material
Source: PubMed Central journal article supplement (PMC4707203)
Supplement: supp_ddt059_ddt059supp_fig1.pdf [file supp_ddt059_ddt059supp_fig1.pdf]

Supplementary Figure 1. AP Families with EPHA7 variants consistent with linkage. EPHA7 variants are indicated below affected subjects with filled boxes (grey or black) indicating typing for variants at codons Ile138Val, Pro278Ser or Asn357Ser, as indicated. Note that subject 877-222 is homozygous for variants 138Val and 278Ser.

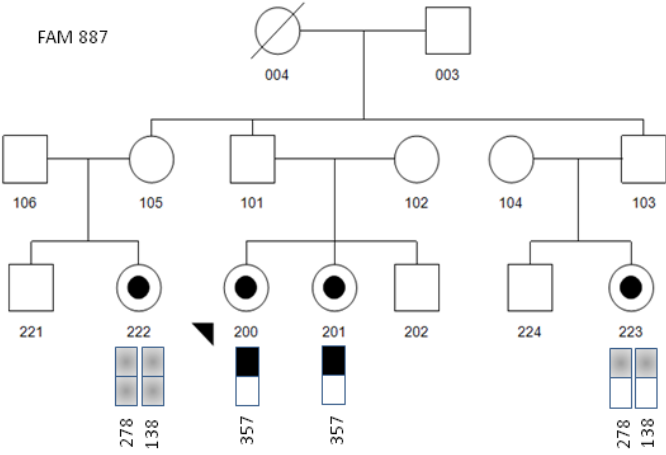

Suppl Fig 1A

FAM 936

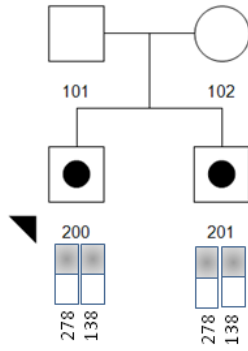

FAM 2028

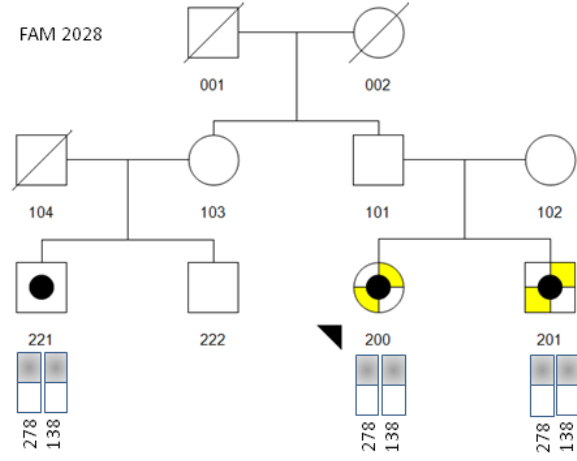

Suppl Fig 1B

FAM 2008

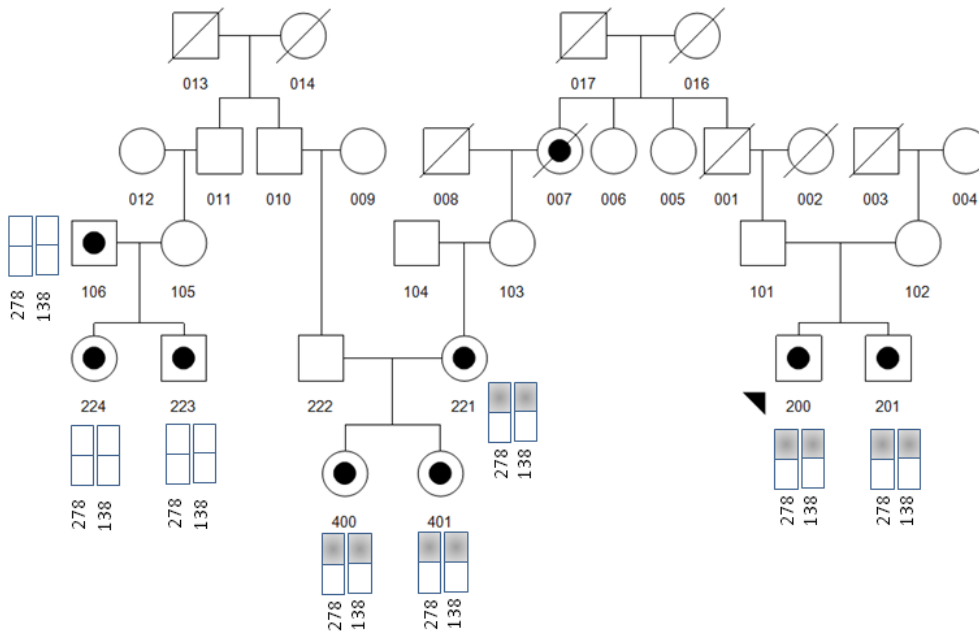

Suppl Fig 1C
