# Supplementary material
Source: PubMed Central journal article supplement (PMC4707203)

Supplementary Figure 2A. Families with synesthesia used for linkage analysis. Filled circles indicated subjects with synesthesia; Subjects with DNA and genotyping incated with +. Subjects reporting (but not tested) for absolute pitch indicated with AP.

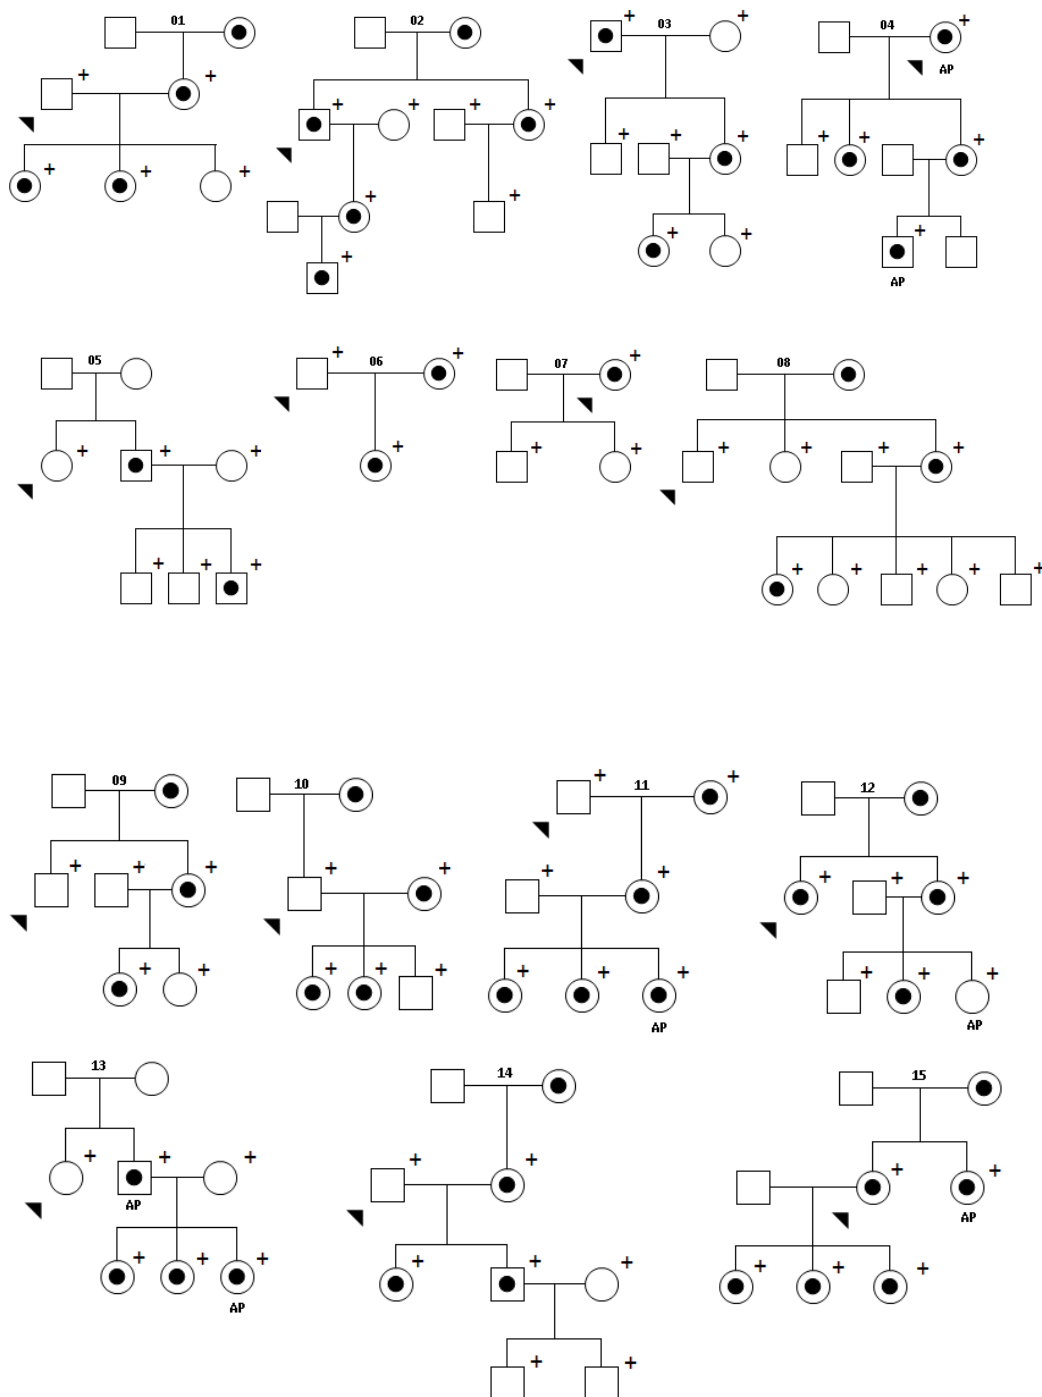

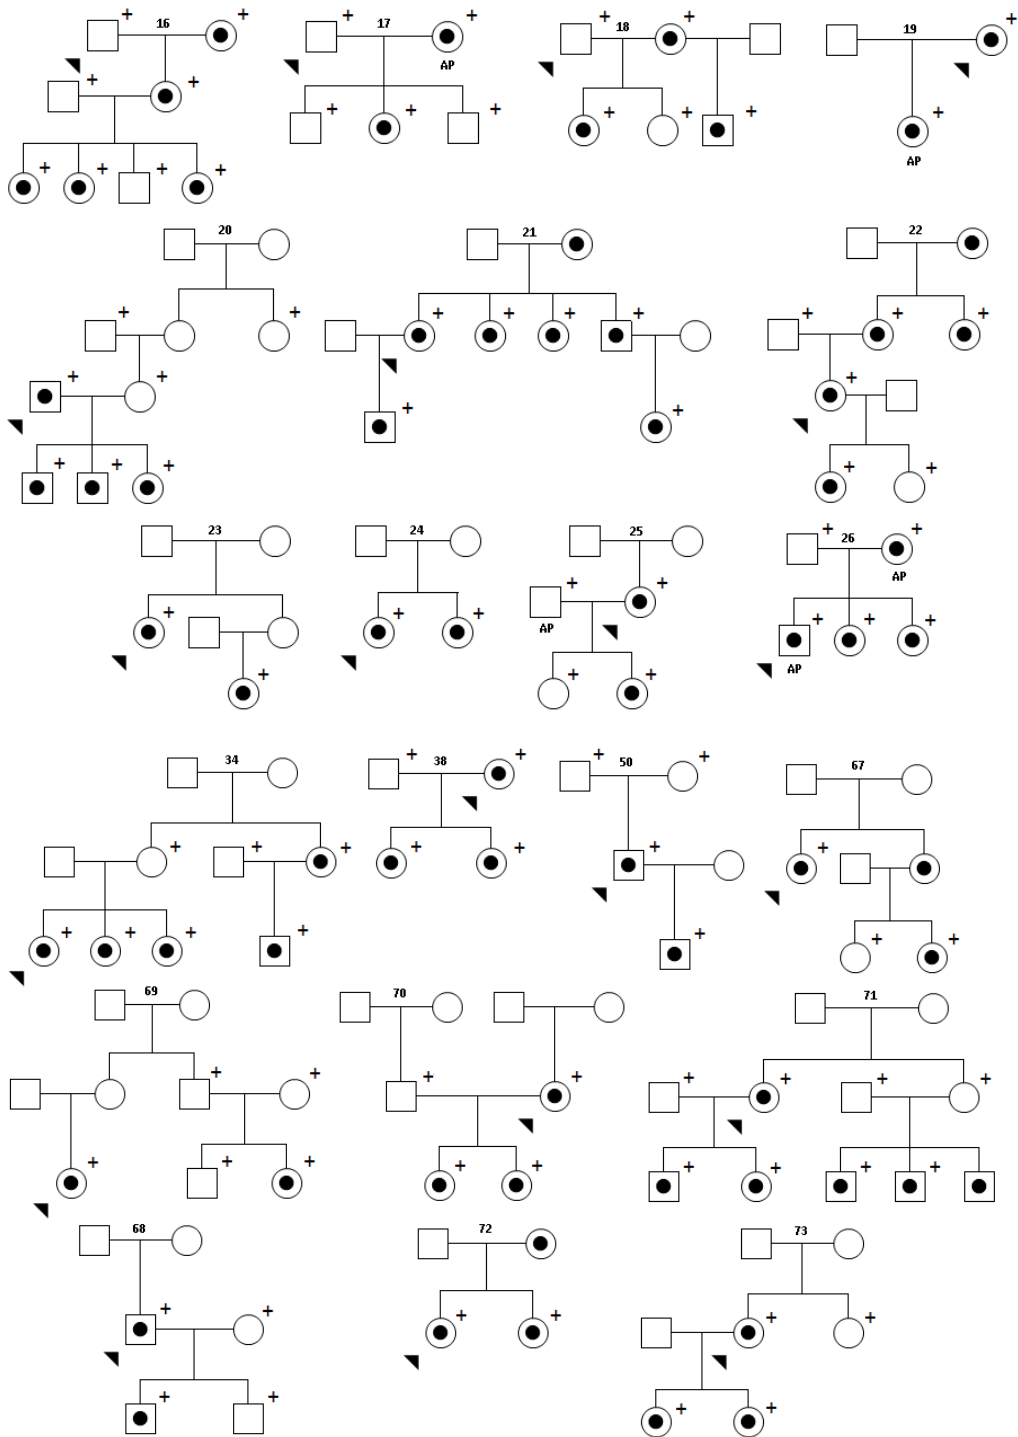

Supplementary Figure 2B. Families with absolute pitch utilized for linkage studies. Dark filled symbols indicate the presence of AP. Yellow diagonal coloring indicates self reported synesthesia. + indicates subject with DNA and genotyping available.

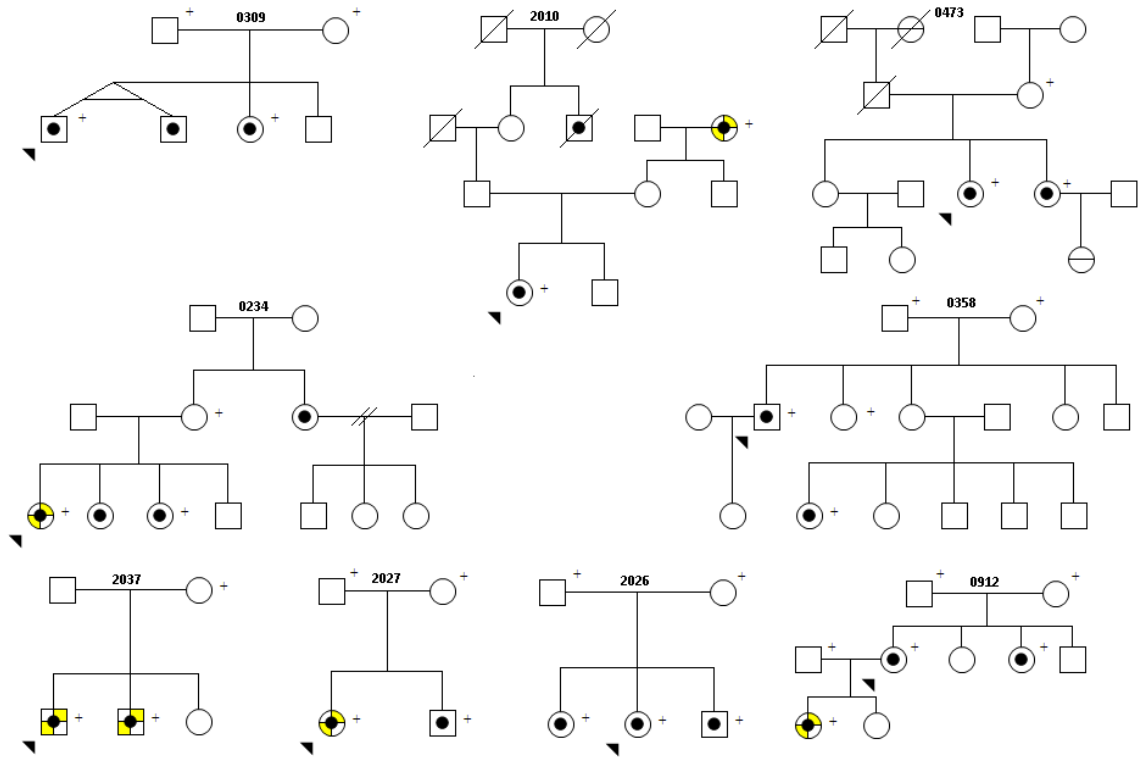

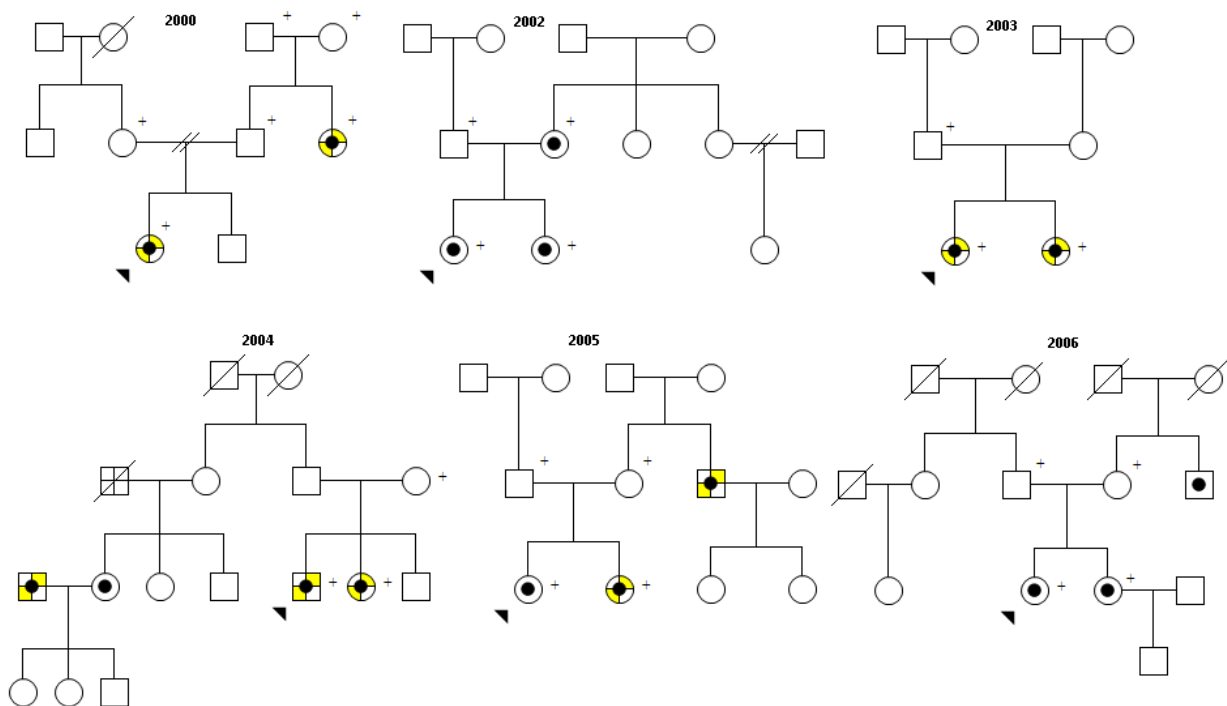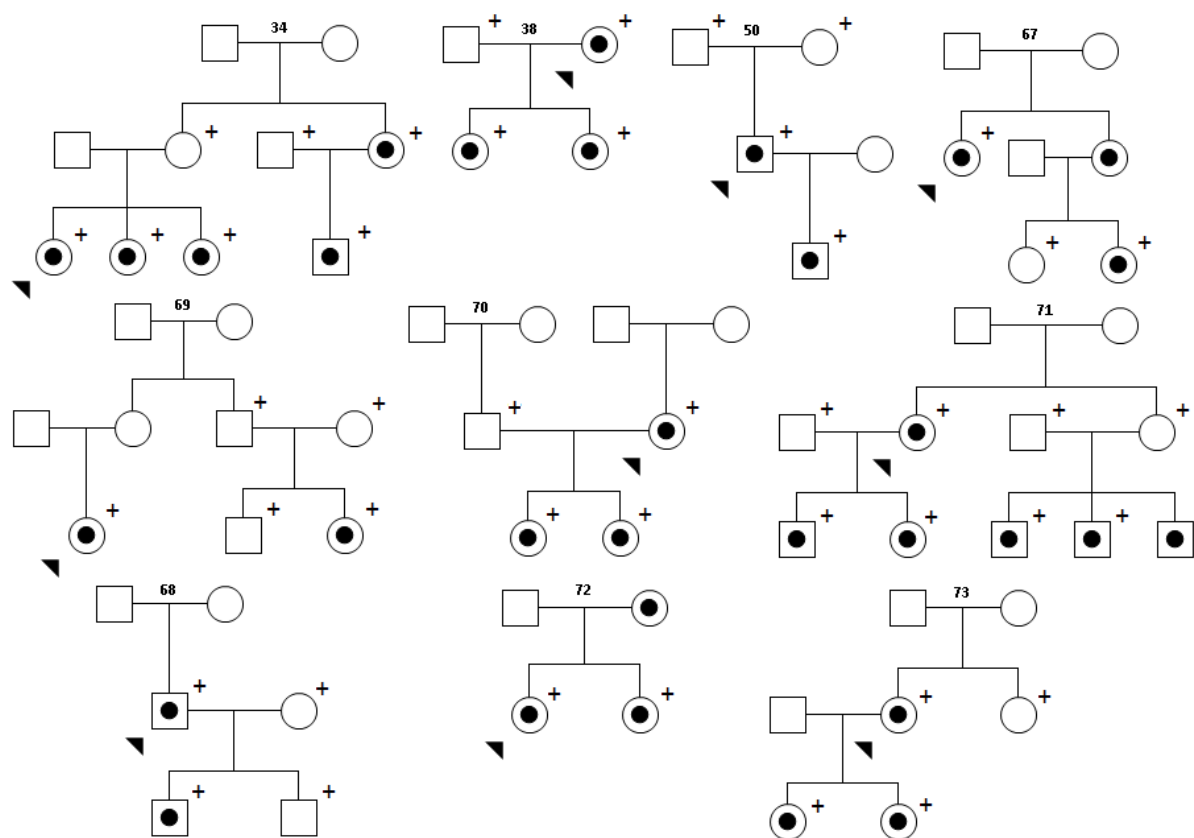

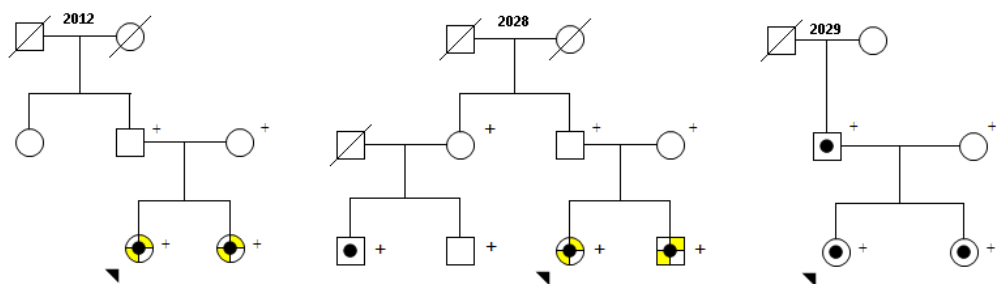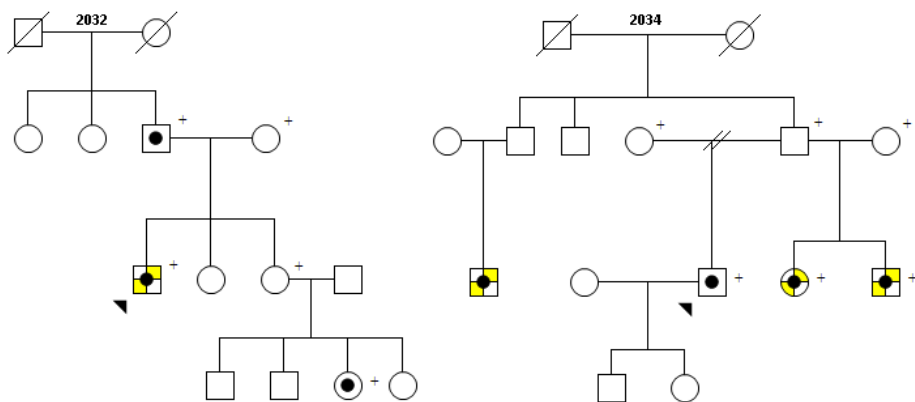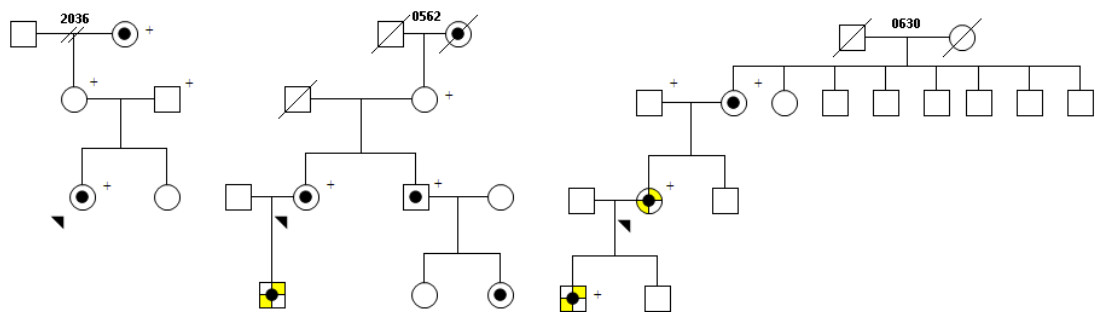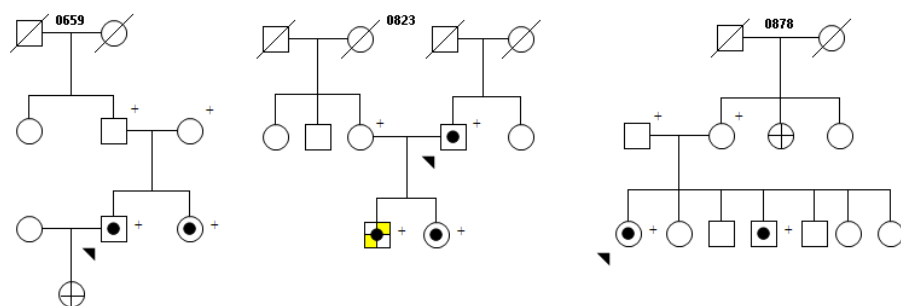

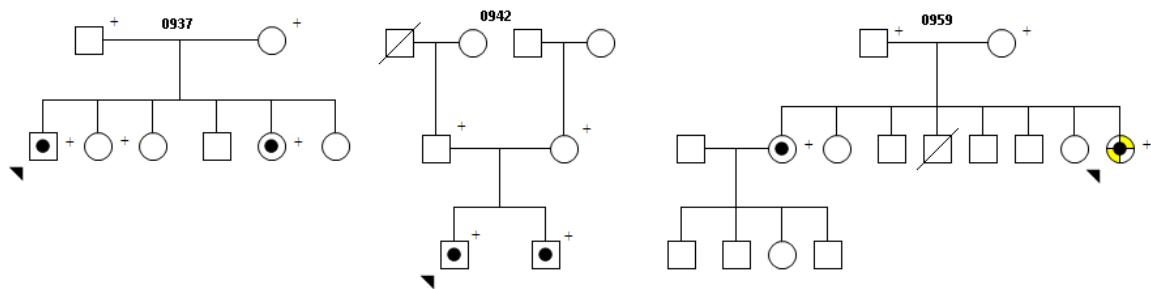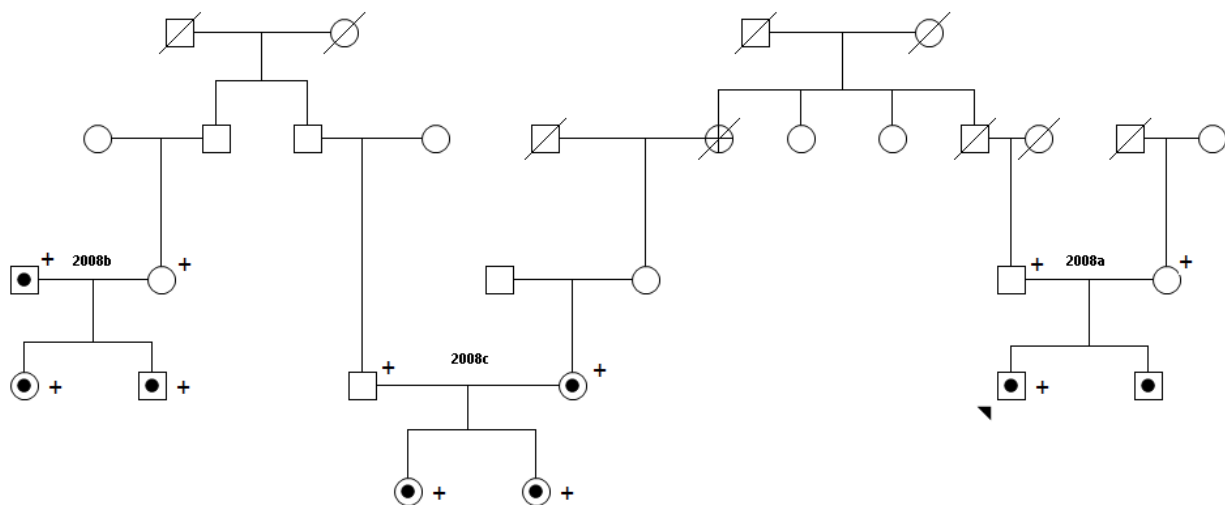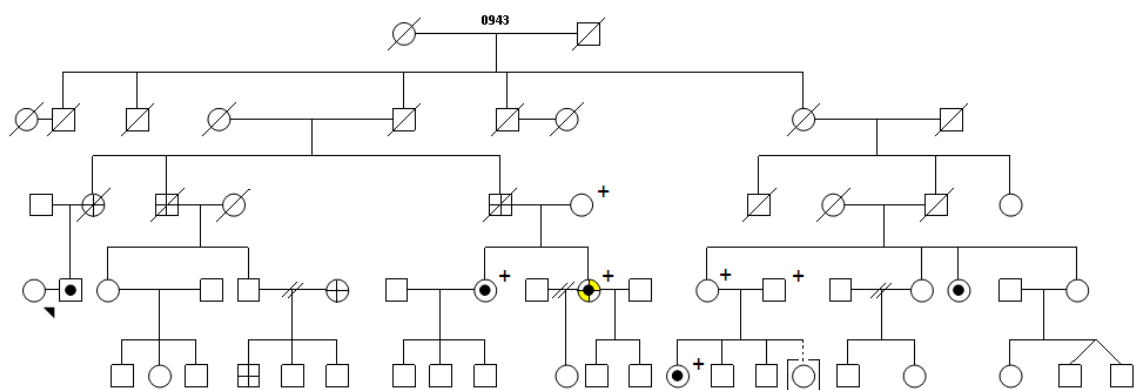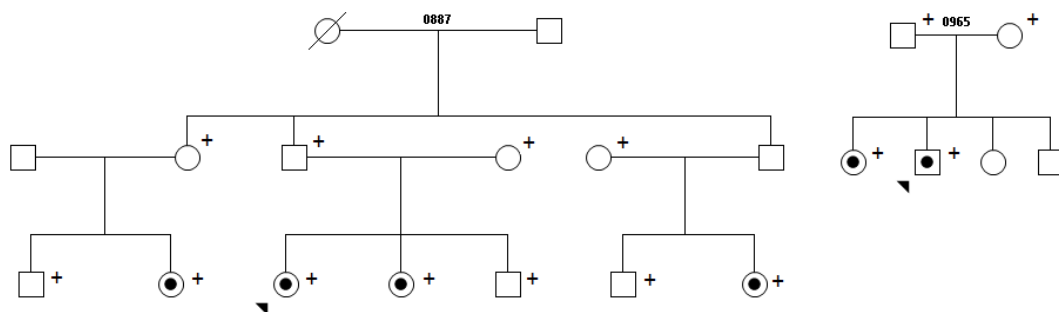

Supplement: supp_ddt059_ddt059supp_fig2.pdf [file supp_ddt059_ddt059supp_fig2.pdf]
